# Supplementary material
Source: publisher figshare collection journal article supplement (https://springernature.figshare.com/ndownloader/files/10267983)
Supplement: Supplementary file [file 10267983]

**Additional file 3.** The correlation between the term similarity by state-of-art methods and prior knowledge in HPO project. A. The distribution of the similarity score by CroGO method. B. The distribution of the similarity score by VSM method. C. The distribution of the similarity score by ASR method.

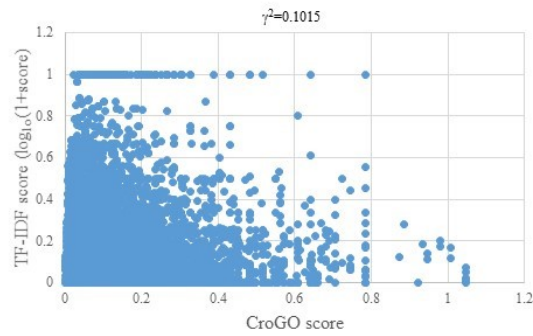

A

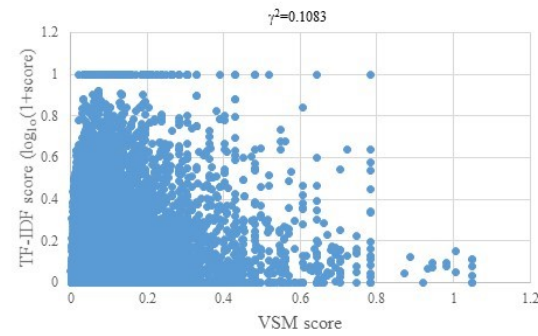

B

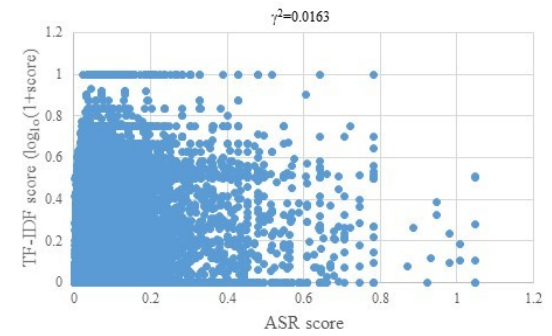

C
